# Supplementary material for: Metal-Free Antibacterial Additives Based on Graphene Materials and Salicylic Acid: From the Bench to Fabric Applications
Source: PubMed Central journal article supplement (PMC8289172; doi:10.1021/acsami.1c02330), 2021-05-26
Supplement: am1c02330_si_001.pdf [file am1c02330_si_001.pdf]

## Supporting information

### **Metal-free antibacterial additives based on graphene materials and salicylic acid: from the bench to fabrics applications.**

*Giacomo Biagiotti,<sup>a,b</sup> Annalisa Salvatore,<sup>c,£</sup> Gianluca Toniolo,<sup>a,b</sup> Lucrezia Caselli,<sup>a,c</sup> Maura*

*Di Vito,<sup>d,e</sup> Margherita Cacaci,<sup>d,i</sup> Luca Contiero,<sup>f</sup> Tommaso Gori,<sup>g</sup> Michele Maggini,<sup>h</sup>*

*Maurizio Sanguinetti,<sup>d,i</sup> Debora Berti,<sup>a,c</sup> Francesca Bugli,<sup>d,i</sup> Barbara Richichi,<sup>a,b,\*,#</sup> Stefano*

*Cicchi,<sup>a,b,\*#</sup>*

a) Department of Chemistry, Università di Firenze, Via della Lastruccia 3-13, 50019, Sesto

Fiorentino, Italy ; b) INSTM (Consorzio Interuniversitario Nazionale per la Scienza e

Tecnologia dei Materiali) Via G. Giusti, 9, 50121 Firenze (ITALY); c) CSGI (Italian Center

for Colloid and Surface Science, Via della Lastruccia 3, Sesto Fiorentino, 50019 Firenze,

Italy; d) Dipartimento di Scienze Biotecnologiche di Base, Cliniche Intensivologiche e

Perioperatorie, Università Cattolica del Sacro Cuore, Rome, Italy; e) Dipartimento di

Scienze e Tecnologie Agro-Alimentari, Università di Bologna, Viale G. Fanin 42, 40127

Bologna, Italy; f) Cromology Italia S.p.A., Via IV Novembre, 4, 55016 Z.I. Porcari (Lucca);

g) Beste S,p,A Via Primo Levi, 6 59022 Colle Cantagallo - Prato – Italy; h) Dipartimento di

Scienze Chimiche, Università degli Studi di Padova, Via Marzolo 1, 35131, Padova, Italy; i)

Dipartimento di Scienze di Laboratorio e Infettivologiche, Fondazione Policlinico

Universitario A. Gemelli IRCCS, Rome, Italy.

£ Present address: Evotec, 111 Innovation Drive, Milton Park, Abingdon, Oxfordshire

OX144RZ, England, UK

#B.R. and S.C. are co-last and co-corresponding authors

Corresponding authors: [stefano.cicchi@unifi.it](mailto:stefano.cicchi@unifi.it); [barbara.richichi@unifi.it](mailto:barbara.richichi@unifi.it).

## Contents

|                                                                                                                                                                                                                                                                             |     |
|-----------------------------------------------------------------------------------------------------------------------------------------------------------------------------------------------------------------------------------------------------------------------------|-----|
| <b>Figure S1.</b> UV-Vis spectrum of a) GO (0.05 mg/mL in H <sub>2</sub> O); b) r-GO <b>2</b> (0.05 mg/mL in H <sub>2</sub> O) prepared from GO powder ( $\lambda_{\max}$ = 271 nm) with SDC. c) FT-IR spectrum of r-GO <b>2</b> , KBr tablet prepared from GO powder. .... | S-4 |
| <b>Figure S2.</b> TEM image of r-GO <b>2</b> prepared from GO powder. ....                                                                                                                                                                                                  | S-4 |
| <b>Figure S3.</b> A) UV-Vis spectrum of rGO <b>2</b> (0.05 mg/mL in H <sub>2</sub> O) prepared from GO powder without SDC ( $\lambda_{\max}$ = 273 nm). B) FT-IR spectrum of r-GO <b>2</b> KBr tablet prepared from GO powder without SDC. ....                             | S-5 |
| <b>Figure S4.</b> A) UV-Vis spectrum of r-GO <b>2</b> (0.05mg/mL in H <sub>2</sub> O) prepared from GO solution (0.4 % wt water GO). ( $\lambda_{\max}$ = 269 nm). B) FT-IR spectrum of r-GO <b>2</b> KBr tablet prepared from GO solution (0.4 % wt water GO). ....        | S-5 |
| <b>Figure S5.</b> A) UV-Vis spectrum of r-GO-SA <b>4</b> (0.05mg/mL in H <sub>2</sub> O); $\lambda_{\max}$ = 269, 211 nm b) TEM image of r-GO-SA <b>4</b> . ....                                                                                                            | S-5 |
| <b>Figure S6.</b> TGA analysis under nitrogen atmosphere of r-GO-SA <b>4</b> : a) with SDC (r-GO-SA <b>4 a</b> ) (0.34 mmol/g, 4.70 % w/w) and b) without SDC (r-GO-SA <b>4 b</b> ) (0.39 mmol/g, 5.39 % w/w). The weight loss calculated between 150 and 600 °C. ....      | S-6 |
| <b>Figure S7.</b> UV-Vis spectrum of r-GO-SA <b>4</b> ....                                                                                                                                                                                                                  | S-6 |
| <b>Figure S8.</b> a) UV-Vis spectrum of r-GO-SA <b>4</b> (0.05mg/mL in H <sub>2</sub> O); $\lambda_{\max}$ = 269, 210 nm. b) FT-IR spectrum of r-GO-SA <b>4</b> KBr tablet. ....                                                                                            | S-7 |
| <b>Figure S9.</b> a) Intensity of UV-Vis spectrum of r-GO-SA <b>4</b> dispersion (0.05 mg/mL) measured at 270 nm over time. ....                                                                                                                                            | S-7 |
| <b>Figure S10.</b> Hydrodynamic size of r-GO-SA <b>4</b> dispersion (0.05 mg/mL) over time. ....                                                                                                                                                                            | S-7 |
| <b>Figure S11.</b> a) UV-Vis spectrum of 4-amminosalicylic acid (red-line) and GO-SA <b>5</b> (black line). b) FT-IR of GO-SA <b>5</b> . c) TGA analysis in air of GO <b>1</b> (red line) and GO-SA <b>5</b> (black line). ....                                             | S-8 |

|                                                                                                                                                                                                                                                                                                                                                                                                                                                                  |      |
|------------------------------------------------------------------------------------------------------------------------------------------------------------------------------------------------------------------------------------------------------------------------------------------------------------------------------------------------------------------------------------------------------------------------------------------------------------------|------|
| <b>Table S1.</b> Elemental analysis data related to mechanochemical synthesis of <b>5</b> performed on 4 different samples. ....                                                                                                                                                                                                                                                                                                                                 | S-8  |
| <b>Figure S12.</b> QCM-D frequency shift ( $\Delta f$ ) for all the overtones as a function of time during the formation of the adlayer: A) GO ( <b>1</b> ), B) r-GO ( <b>2</b> ), C) GO-SA ( <b>5</b> ), D) r-GO-SA ( <b>4</b> ). Samples' injection (1) was followed by milliQ water rinsing (2). Then, a ECE B and sodium perborate-based detergent was flushed into the measuring chamber (3), followed by a second rinsing step with milliQ water (4). .... | S-9  |
| <b>Figure S13.</b> Pictures of cotton fibers embedded with a) r-GO <b>2</b> (with SDC); b) r-GO-SA <b>4</b> (with SDC); c) r-GO-SA <b>4</b> (without SDC); d) GO <b>1</b> ; e) GO-SA <b>5</b> ; .....                                                                                                                                                                                                                                                            | S-9  |
| <b>Figure S14:</b> Raman spectra of pure GO and r-GO powders .....                                                                                                                                                                                                                                                                                                                                                                                               | S-10 |
| <b>Figure S15:</b> Raman map of the integrated G line intensity of graphene (1453-1669 $\text{cm}^{-1}$ ) over the surface of the cotton fabric, treated with: a) <b>1</b> (sample fabric+1); b) <b>2</b> (sample fabric+2). ....                                                                                                                                                                                                                                | S-10 |
| <b>Figure S16:</b> Raman map of the integrated G line intensity of graphene (1453-1669 $\text{cm}^{-1}$ ) over the surface of the fabric, treated with <b>4</b> .....                                                                                                                                                                                                                                                                                            | S-10 |
| <b>Figure S17:</b> Structure of sodium deoxycholate (SDC) .....                                                                                                                                                                                                                                                                                                                                                                                                  | S-11 |
| <b>Table S2</b> .....                                                                                                                                                                                                                                                                                                                                                                                                                                            | S-11 |

## Synthesis of **2** (rGO)

### Without sodium deoxycholate (SDC)

100 mg of **1** (spray dry powder) were dispersed in 400 mL of MilliQ water (0.25 mg/mL), then the same procedure described in the main text has been employed. UV-Vis:  $\lambda_{\text{max}} = 270 \text{ nm}$  (Figure S3a). FT-IR: 3425, 1552, 1519, 1404 and 1290  $\text{cm}^{-1}$  (Figure S3b). Elemental analysis: C 45.50%, H 0.98 %, N 0.78 %

### Using **1** (GO) water dispersion (0.4 % w/w)

12.5 mL of aqueous dispersion of **1** (4.0 mg/mL, 50 mg) were diluted to 50 mL with milliQ water. Then, SDC (200 mg) was added and the pH was adjusted at 8 with solid  $\text{Na}_2\text{CO}_3$ . The dispersion was treated in ultrasonic bath (1h, 59 Hz.). Then, 128  $\mu\text{L}$  of hydrazine solution (30% in water) were added and the mixture was stirred at 80°C for 12 h. The crude mixture was used for further reaction without purification. UV-Vis:  $\lambda_{\text{max}} = 270 \text{ nm}$  (Figure S4a). FT-IR: 3739, 3256, 1648, 1553, 1400, 1163, 1036.6, 831 and 697  $\text{cm}^{-1}$  (Figure S4b). Elemental analysis: C 45.12 %, H 0.81 %, N 0.54 %

See Figures S3 and S4

## Synthesis of **4** (r-GO-SA)

### *Without sodium deoxycholate (SDC)*

The functionalization of r-GO **2** without surfactant was carried out accordingly to the procedure described in the main text. The diazonium salt was prepared using 5-fold excess in weight of **3** compared to r-GO **2** (0.2 mg/mL water dispersion). UV-Vis  $\lambda_{\text{max}} = 210$  and 270 nm (Figure S8a).

Loading of salicylic acid based on TGA under nitrogen atmosphere 5.39 % w/w (Figure S6b). FT-IR: 3739, 3618, 3226, 3107, 1743, 1550, 1211  $\text{cm}^{-1}$  (Figure S8b).

Synthesis of r-GO-SA **4** (from **2**, prepared using the 0.4% w/w water dispersion of **1** (GO))

$\text{NaNO}_2$  (385 mg, 5.6 mmol) and 4-aminosalicylic acid (250 mg, 1.6 mmol) were dissolved in 20.4 mL of a NaOH solution (0.25 % w/v in water). The mixture was added dropwise to an ice cooled HCl solution (0.1 M in water, 26.6 mL) under vigorous stirring. The resulting solution was transferred, dropwise, to a dispersion of **2**-SDC (50 mg, 1 mg/mL) kept at pH 6 and at 0 °C under stirring. The final dispersion was sonicated for 1h (59 Hz) and then stirred at 80°C for 12 h. The reaction mixture was filtered (polycarbonate filters, 0.4  $\mu\text{m}$ ) and the filtrate was dispersed in water (1.0 mg/mL) and dialyzed vs water for four days to give 50 mg of pure r-GO-SA **4**. UV-Vis  $\lambda_{\text{max}} = 270$  and 211 nm (Figure S7).

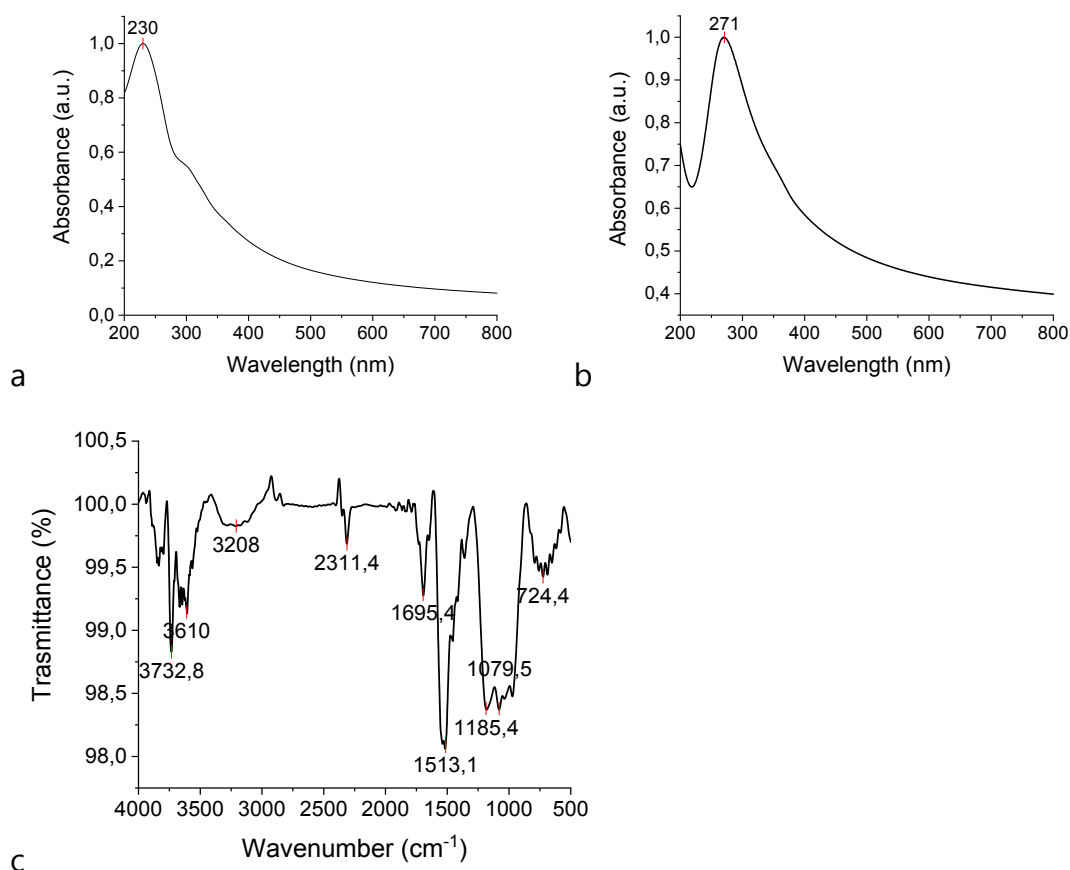

**Figure S1.** UV-Vis spectrum of a) GO (0.05 mg/mL in  $\text{H}_2\text{O}$ ); b) r-GO **2** (0.05 mg/mL in  $\text{H}_2\text{O}$ ) prepared from GO powder ( $\lambda_{\text{max}} = 271$  nm) with SDC. c) FT-IR spectrum of r-GO **2**, KBr tablet prepared from GO powder.

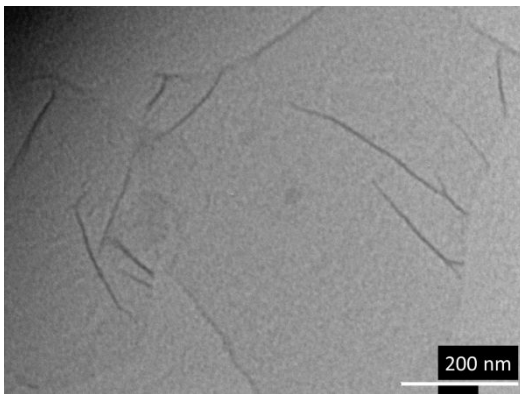

**Figure S2.** TEM image of r-GO **2** prepared from GO powder.

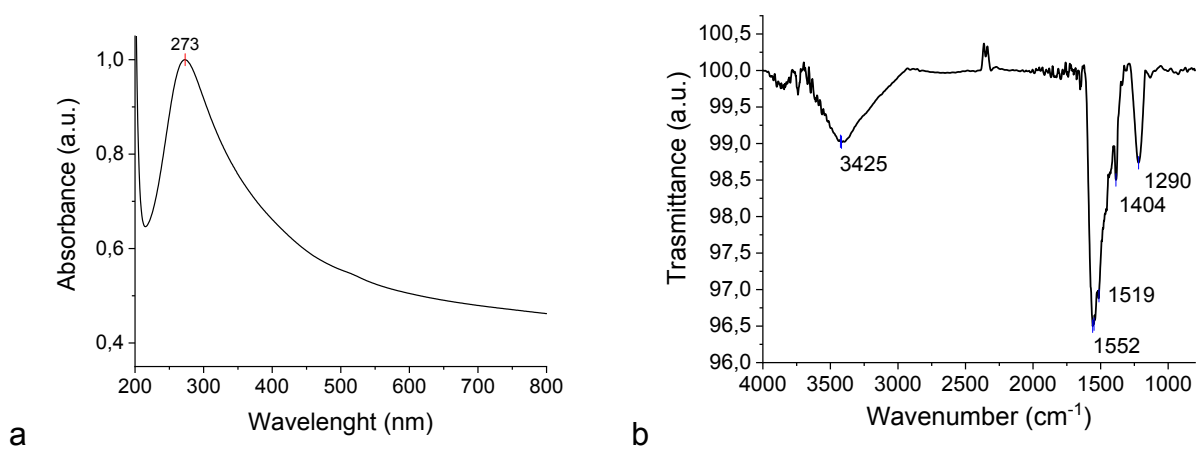

**Figure S3.** A) UV-Vis spectrum of rGO **2** (0.05 mg/mL in H<sub>2</sub>O) prepared from GO powder without SDC ( $\lambda_{\text{max}} = 273$  nm). B) FT-IR spectrum of r-GO **2** KBr tablet prepared from GO powder without SDC.

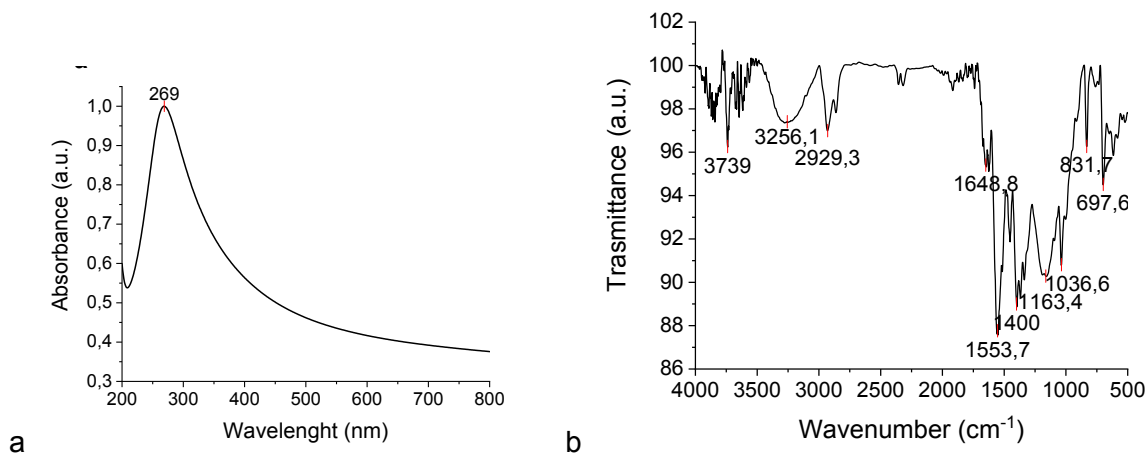

**Figure S4.** A) UV-Vis spectrum of r-GO **2** (0.05mg/mL in H<sub>2</sub>O) prepared from GO solution (0.4 % wt water GO). ( $\lambda_{\text{max}} = 269$  nm). B) FT-IR spectrum of r-GO **2** KBr tablet prepared from GO solution (0.4 % wt water GO).

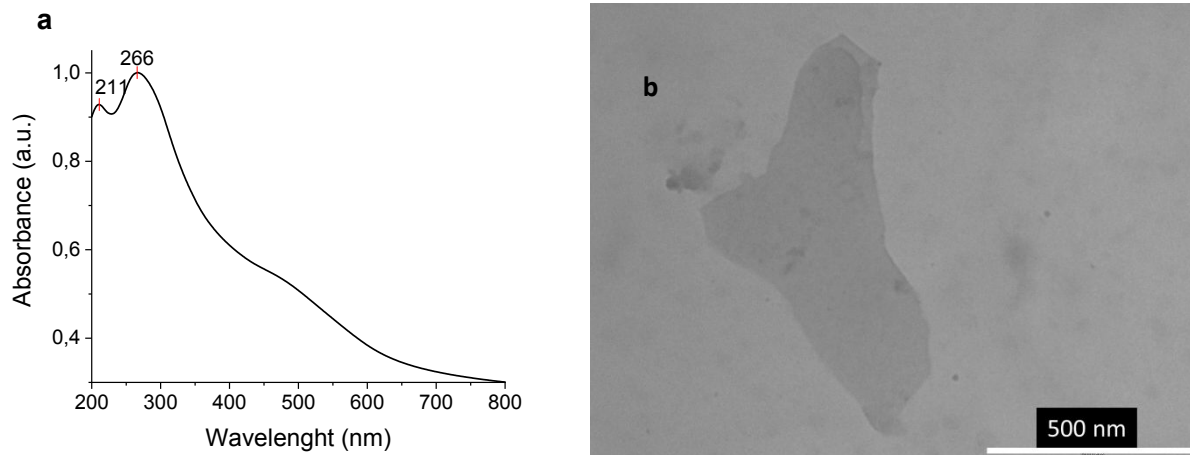

**Figure S5.** A) UV-Vis spectrum of r-GO-SA **4** (0.05mg/mL in H<sub>2</sub>O);  $\lambda_{\text{max}} = 269, 211$  nm b) TEM image of r-GO-SA **4**.

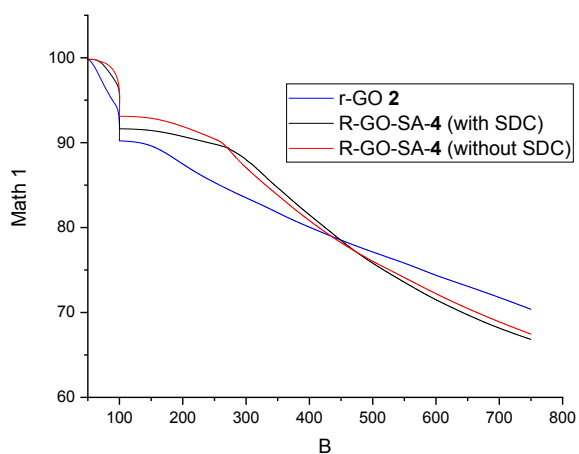

**Figure S6.** TGA analysis under nitrogen atmosphere of r-GO-SA 4: a) with SDC (r-GO-SA 4 a) (0.34 mmol/g, 4.70 % w/w) and b) without SDC (r-GO-SA 4 b) (0.39 mmol/g, 5.39 % w/w). The weight loss calculated between 150 and 600 °C.

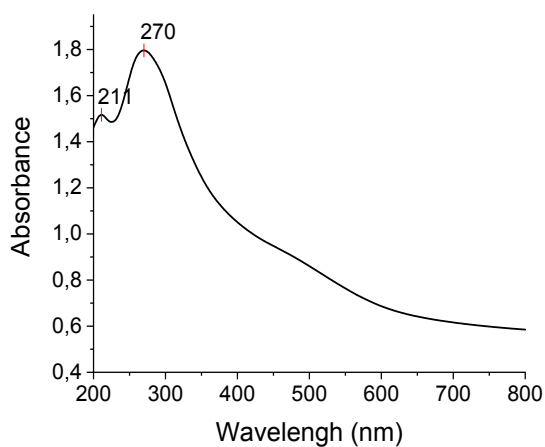

**Figure S7.** UV-Vis spectrum of r-GO-SA 4

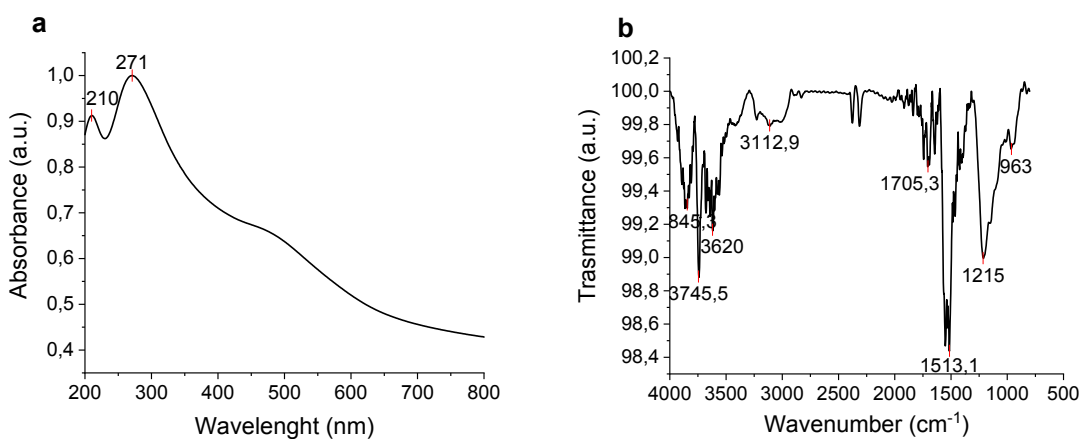

**Figure S8.** a) UV-Vis spectrum of r-GO-SA 4 (0.05mg/mL in H<sub>2</sub>O);  $\lambda_{\text{max}} = 269, 210$  nm. b) FT-IR spectrum of r-GO-SA 4 KBr tablet.

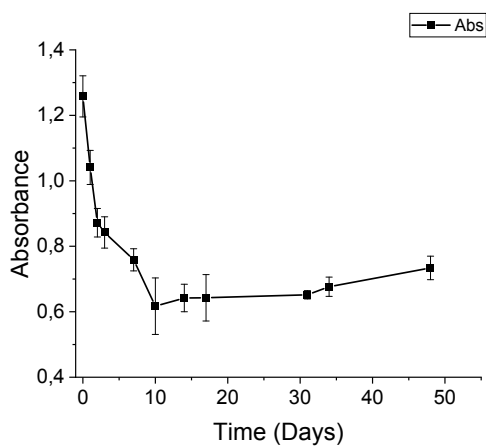

**Figure S9.** a) Intensity of UV-Vis spectrum of r-GO-SA 4 dispersion (0.05 mg/mL) measured at 270 nm over time.

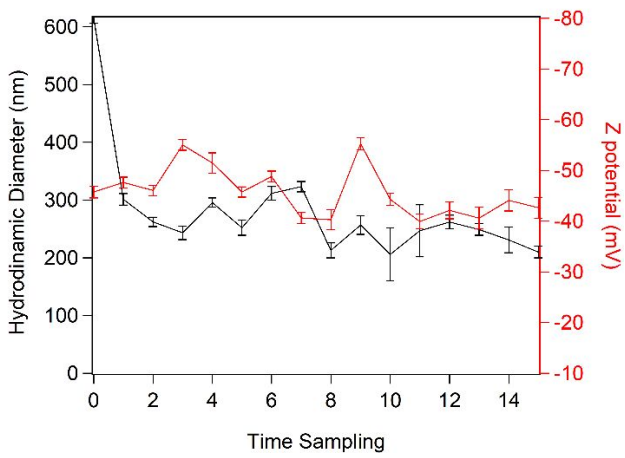

**Figure S10.** Hydrodynamic size of r-GO-SA 4 dispersion (0.05 mg/mL) over time.

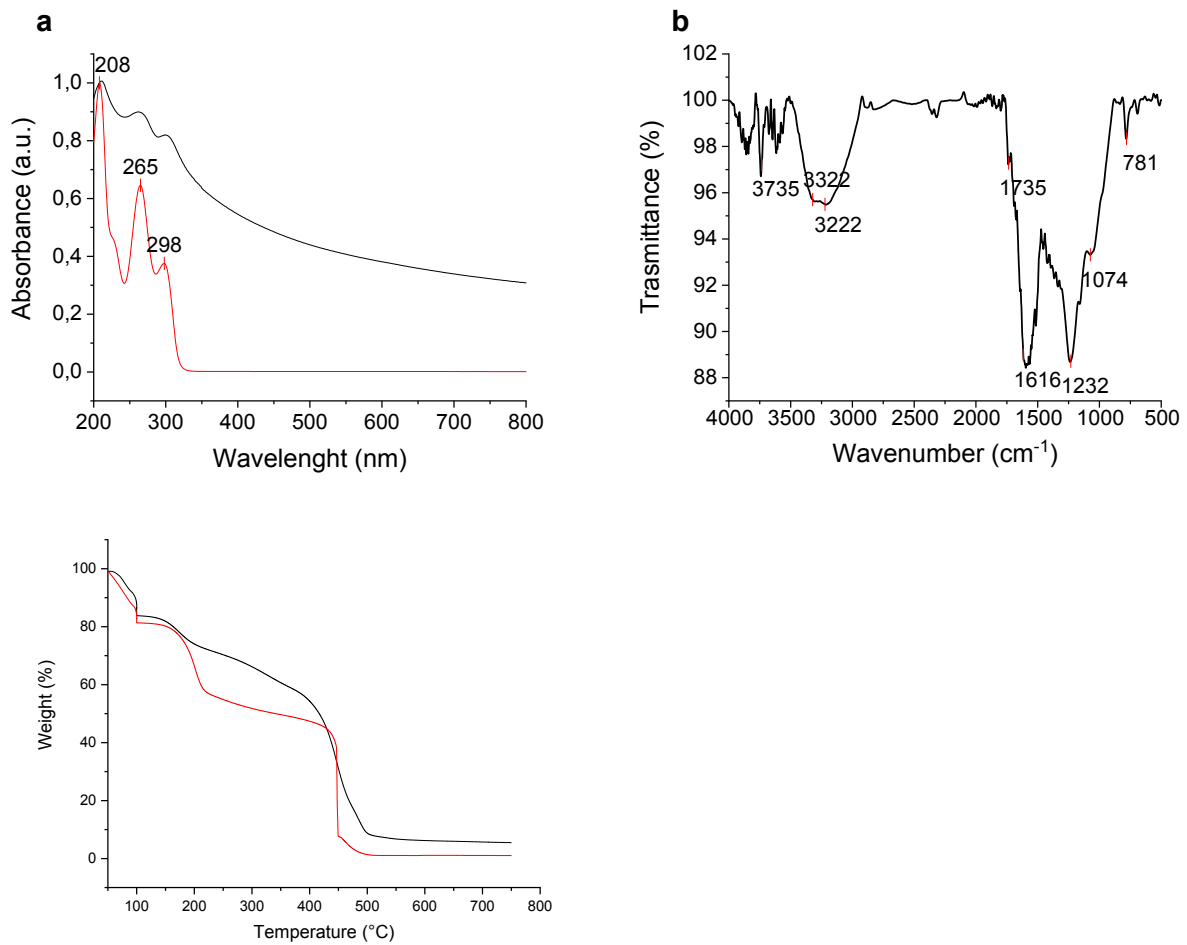

**c**



**Figure S11.** a) UV-Vis spectrum of 4-amminosalicylic acid (red-line) and GO-SA **5** (black line). b) FT-IR of GO-SA **5**. c) TGA analysis in air of GO **1** (red line) and GO-SA **5** (black line).

**Table S1.** Elemental analysis data related to mechanochemical synthesis of **5** performed on 4 different samples.

| Sample | Ratio<br>4-ASA/GO | N%   | C%    | H%   | Loading mmol/g |
|--------|-------------------|------|-------|------|----------------|
| a      | 1:1               | 2,07 | 42,60 | 2,80 | 1,47           |
| b      | 1:1               | 1,56 | 43,55 | 1,92 | 1,11           |
| c      | 1:1               | 1,31 | 42,40 | 2,40 | 0,93           |
| d      | 1:1               | 1,42 | 42,80 | 2,73 | 1,01           |

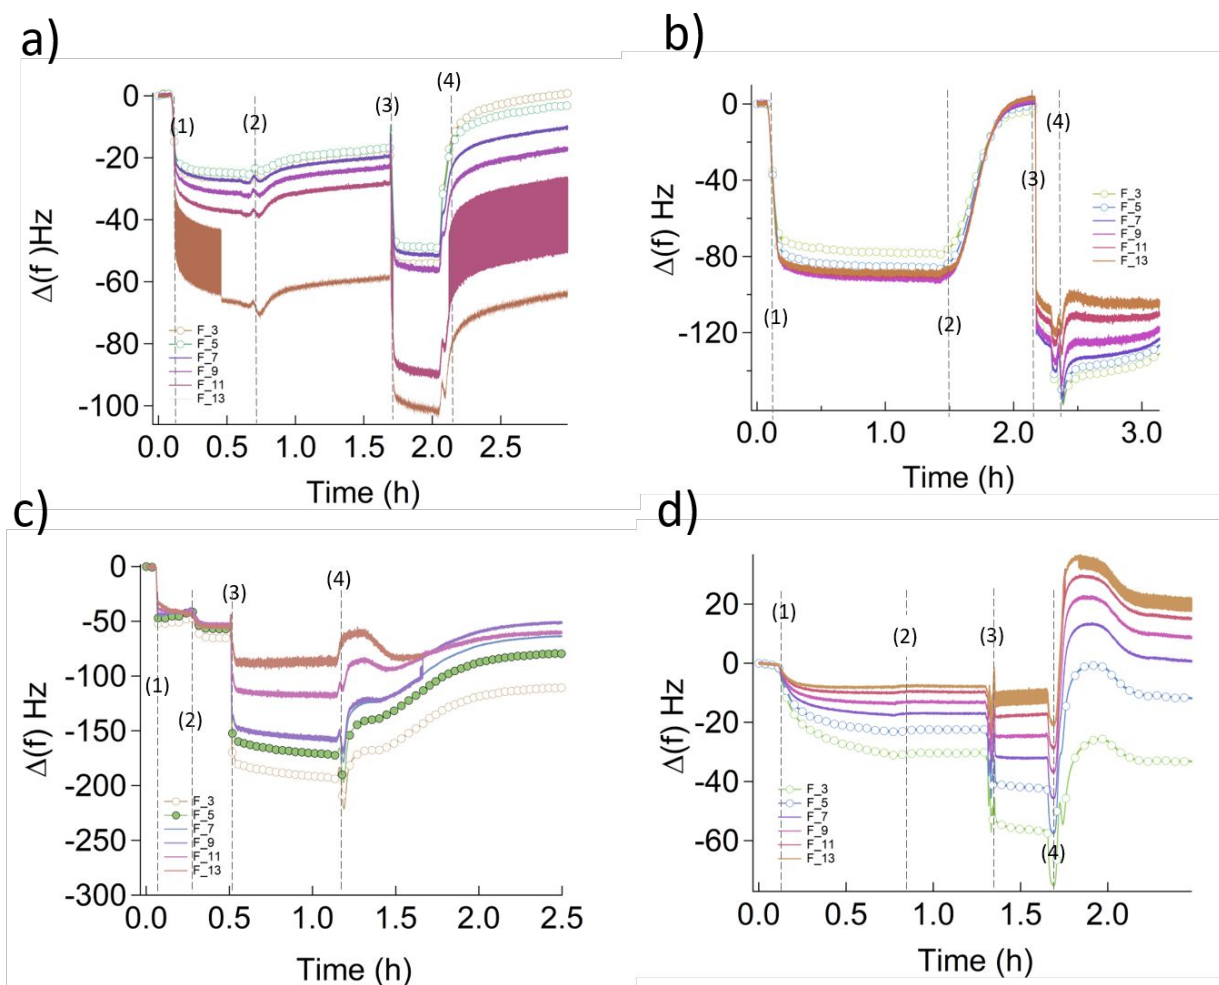

**Figure S12.** QCM-D frequency shift ( $\Delta f$ ) for all the overtones as a function of time during the formation of the adlayer: A) GO (1), B) r-GO (2), C) GO-SA (5), D) r-GO-SA (4). Samples' injection (1) was followed by milliQ water rinsing (2). Then, a ECE B and sodium perborate-based detergent was flushed into the measuring chamber (3), followed by a second rinsing step with milliQ water (4).

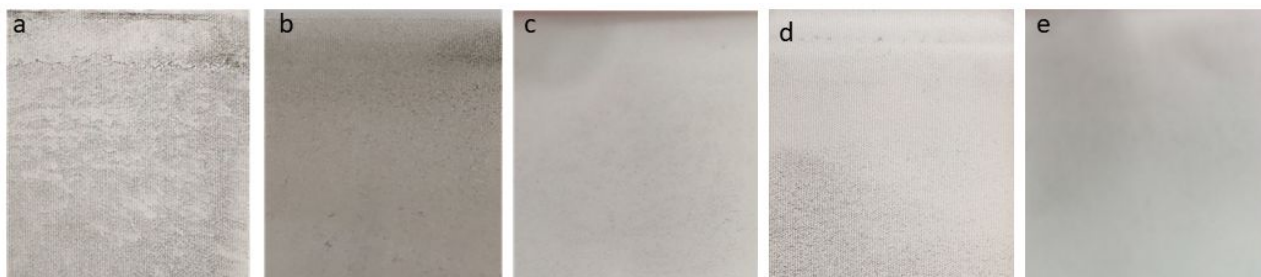

**Figure S13.** Pictures of cotton fibers embedded with a) r-GO 2 (with SDC); b) r-GO-SA 4 (with SDC); c) r-GO-SA 4 (without SDC); d) GO 1; e) GO-SA 5;

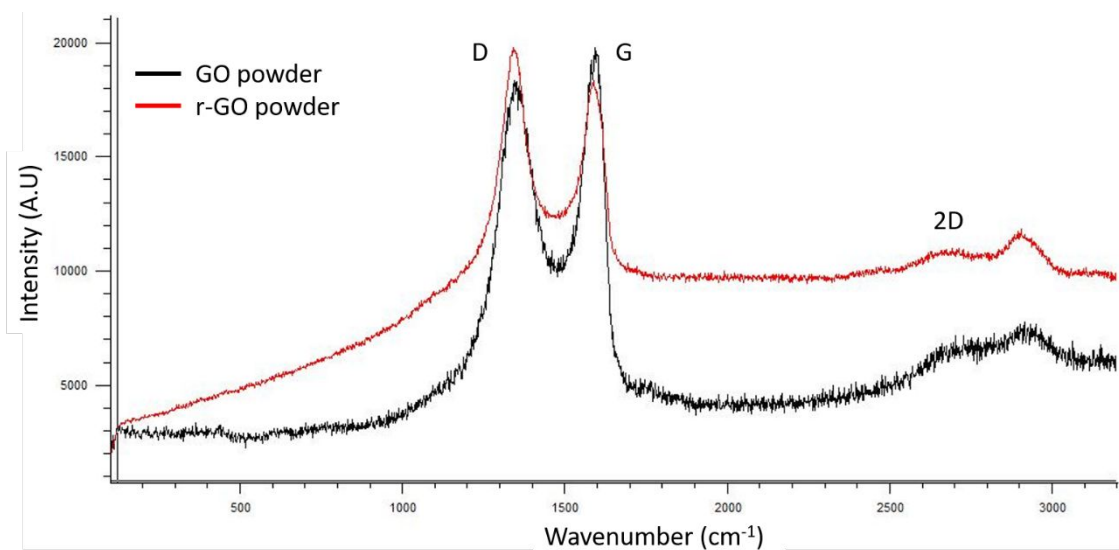

**Figure S14:** Raman spectra of pure GO and r-GO powders

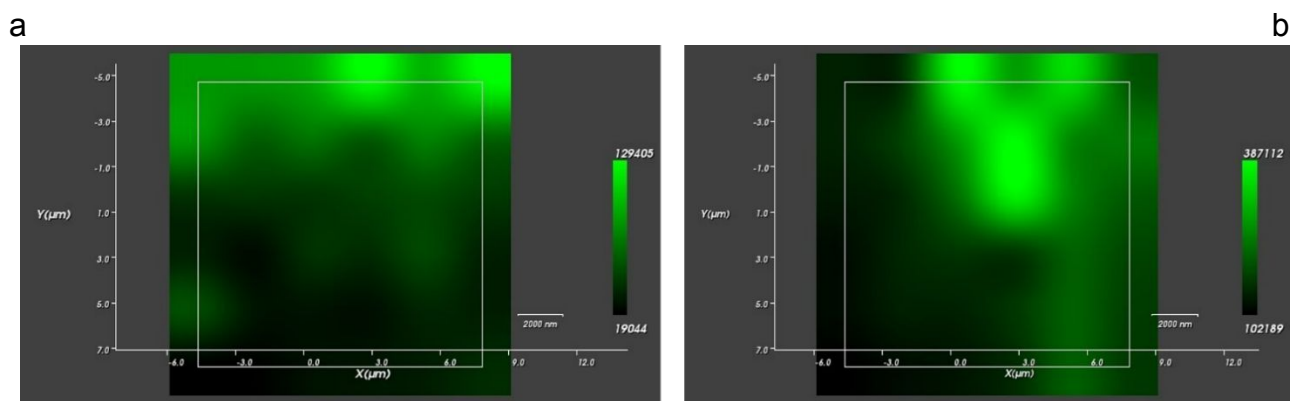

**Figure S15:** Raman map of the integrated G line intensity of graphene ( $1453\text{-}1669\text{ cm}^{-1}$ ) over the surface of the cotton fabric, treated with: a) **1** (sample fabric+1); b) **2** (sample fabric+2).

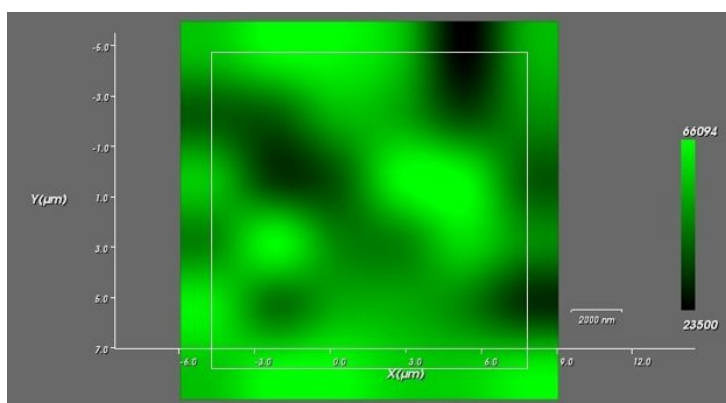

**Figure S16:** Raman map of the integrated G line intensity of graphene ( $1453\text{-}1669\text{ cm}^{-1}$ ) over the surface of the fabric, treated with **4**

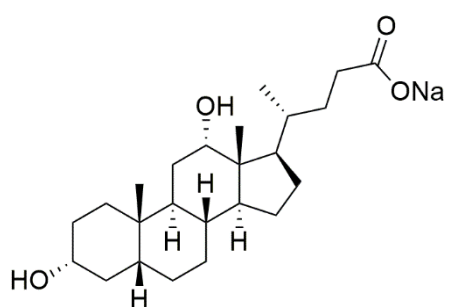

**Figure S17:** Structure of sodium deoxycholate (SDC)

**Table S2**

| Sample          | MCC ( $\mu\text{g/mL}$ ) |                  |                    |
|-----------------|--------------------------|------------------|--------------------|
|                 | <i>K. pneumoniae</i>     | <i>S. aureus</i> | <i>C. albicans</i> |
| rGO <b>2</b>    | 128                      | 2                | >128               |
| rGO-SA <b>4</b> | 64                       | 32               | 64                 |
| GO <b>1</b>     | 128                      | 32               | 128                |
| GO-SA <b>5</b>  | 64                       | >128             | 128                |

MCC= Minimal Cytocidal Concentration,.Table 1 shows the cytocidal values of the compounds tested against the *K. pneumoniae*, *S. aureus* and *C. albicans* strains
